# Supplementary material for: Focusing of sub-micrometer particles and bacteria enabled by two-dimensional acoustophoresis
Source: Royal Society of Chemistry journal article supplement (doi:10.1039/c4lc00202d), 2014-01-01
Supplement: c4lc00202d1.pdf [file c4lc00202d1.pdf]

## **Supporting Information**

### **S1**

**Supporting video 1.** 0.8- $\mu\text{m}$  fluorescent polystyrene particles focusing in a spiral motion in the square microchannel without any flow. The focused particles can be seen to move to the left of the center of the channel at the end of the movie. The reason for this is that they are collected in a local acoustic “hot spot” situated just above the movie frame. The occurrence of local acoustic “hot spots” is in accordance with what has been seen for one-dimensional acoustophoresis, where the acoustic field strength is seen to vary along the channel length.
